# Supplementary material for: The Chemopreventive Phytochemical Moringin Isolated from Moringa oleifera Seeds Inhibits JAK/STAT Signaling
Source: PubMed Central journal article supplement (PMC4909285; doi:10.1371/journal.pone.0157430), 2016-06-15

1. RT-qPCR assays - CT values

Figure 2A - CT values (Ba/F3 cells)

|       | #1     | #2     | #3     | #4     | #5    | #6      | #7    | #8    |
|-------|--------|--------|--------|--------|-------|---------|-------|-------|
|       | - IL-3 | + IL-3 |        |        |       |         |       |       |
|       | DMSO   | DMSO   | SFN    |        |       | GMG-ITC |       |       |
|       | 0.01%  | 0.01%  | 0.4 μM | 2 μM   | 10 μM | 0.4 μM  | 2 μM  | 10 μM |
| Cis   | 28.57  | 23.42  | 23.75  | 24.3   | 25.65 | 23.96   | 24.17 | 28.57 |
| Cis   | 28.63  | 23.47  | 23.71  | 24.21  | 25.46 | 23.86   | 24.01 | 28.5  |
| Osm   | 28.79  | 23.58  | 24.15  | 24.76  | 26.7  | 24.71   | 25.11 | 29.65 |
| Osm   | 27.72  | 23.57  | 24.21  | *25.14 | 27.52 | 24.37   | 25.31 | 29.94 |
| Osm   | 28.05  | 23.71  | *23.67 | 24.74  | 26.84 | 24.37   | 25.49 | **    |
| Osm   | 29.57  | 23.83  | *23.61 | 24.44  | 27.48 | 24.4    | 25.23 | 29.76 |
| c-Myc | 25.15  | 22.57  | 23.11  | 23.22  | 24.89 | 22.78   | 23.55 | 25.84 |
| c-Myc | 25.2   | 22.49  | 23.08  | 23.39  | 24.63 | 23.01   | 23.27 | 26    |
| c-Myc | 25.61  | *22.18 | 22.88  | 23.12  | 24.96 | 23.02   | 23.72 | 25.51 |
| c-Myc | 25.81  | 22.4   | 23     | 23.44  | 24.83 | 22.85   | 23.5  | 25.64 |
| c-Myc | 25.62  | 22.39  | 23     | 23.49  | 24.9  | 22.9    | 23.31 | 25.33 |
| 36b4  | 16.92  | 16.98  | 16.9   | 17     | 16.95 | 17.21   | 17.1  | 17.24 |
| 36b4  | 16.9   | 17.08  | 16.9   | 17.02  | 17.12 | 17.24   | 17.17 | 17.39 |
| S9    | 17.84  | 17.94  | 18.1   | *18.27 | 18.16 | 18.29   | 18.07 | 18.19 |
| S9    | 18.07  | 18.06  | 18.02  | 18.01  | 18.12 | 18.27   | 18.02 | 17.99 |
| S9    | 17.9   | 18.02  | 17.99  | *18.33 | 18.07 | 18.19   | 18.13 | 18.32 |
| S9    | 17.79  | 18.03  | 18.25  | 17.9   | 18.19 | 18.3    | 17.95 | 18.32 |
| S9    | 18.02  | 18.03  | 18.07  | 18.1   | 18.16 | 18.24   | 17.93 | 18.19 |

\* outlier (excluded from average calculation)

\*\* no amplification (excluded from average calculation)

Figure 3A - CT values (HeLa cells)

|       | #1      | #2      | #3     | #4    | #5    | #6      | #7    | #8    |
|-------|---------|---------|--------|-------|-------|---------|-------|-------|
|       | -IFNα2a | +IFNα2a |        |       |       |         |       |       |
|       | DMSO    | DMSO    | SFN    |       |       | GMG-ITC |       |       |
|       | 0.01%   | 0.01%   | 0.4 μM | 2 μM  | 10 μM | 0.4 μM  | 2 μM  | 10 μM |
| G1P3  | 26.57   | 22.6    | 22.4   | 22.83 | 24.62 | 22.67   | 22.89 | 27.04 |
| G1P3  | 26.41   | 22.81   | 22.29  | 23    | 24.28 | 22.71   | 22.83 | 26.65 |
| ISG15 | 23.22   | 20.77   | 20.27  | 20.7  | 21.59 | 20.73   | 20.54 | 23.57 |
| ISG15 | 23.09   | 20.72   | 20.33  | 20.79 | 21.69 | 20.69   | 20.63 | 23.79 |
| STAT1 | 23.34   | 21.32   | 20.97  | 21.23 | 21.99 | 21.26   | 21.39 | 23.33 |
| STAT1 | 23.26   | 21.27   | 20.99  | 21.26 | 22    | 21.06   | 21.33 | 23.45 |
| IRF9  | 28.9    | 23.93   | 23.72  | 23.85 | 24.12 | 23.85   | 23.86 | 26.43 |
| IRF9  | 29.02   | 23.94   | 23.75  | 23.9  | 24.24 | 23.76   | 23.87 | 26.48 |
| c-Myc | 21.86   | 21.57   | 21.24  | 21.36 | 21.4  | 21.48   | 21.28 | 21.93 |
| c-Myc | 21.86   | 21.59   | 21.18  | 21.41 | 21.46 | 21.33   | 21.62 | 21.79 |
| S9    | 21.11   | 20.81   | 20.55  | 20.75 | 20.95 | 20.78   | 20.67 | 21.46 |
| S9    | 21.19   | 20.83   | 20.61  | 20.85 | 21.08 | 20.84   | 20.81 | 21.18 |
| LMNA  | 20.45   | 20.35   | 20.06  | 20.32 | 20.44 | 20.25   | 20.27 | 20.79 |
| LMNA  | 20.43   | 20.33   | 20.25  | 20.35 | 20.32 | 20.2    | 20.41 | 20.88 |
| LMNA  | 20.46   | 20.2    | 20.15  | 20.19 | 20.45 | 20.12   | 20.14 | 20.52 |
| LMNA  | 20.55   | 20.24   | 20.19  | 20.2  | 20.34 | 20.27   | 20.25 | 20.51 |
| LMNA  | *21.02  | 20.25   | 19.96  | 20.26 | 20.18 | 20.34   | 20.34 | 20.51 |

\* outlier (excluded from average calculation)

Figure 4 - CT values (HeLa cells)

|      | #1    | #2     | #3     | #4     | #5     | #6      | #7    | #8    | #9       | #10    |
|------|-------|--------|--------|--------|--------|---------|-------|-------|----------|--------|
|      | -TNF  | +TNF   |        |        |        |         |       |       |          |        |
|      | DMSO  | DMSO   | SFN    |        |        | GMG-ITC |       |       | Curcumin |        |
|      | 0.05% | 0.05%  | 0.4 μM | 2 μM   | 10 μM  | 0.4 μM  | 2 μM  | 10 μM | 10 μM    | 50 μM  |
| IL-8 | 25.41 | 19.44  | 19.38  | 19.61  | 24.01  | 19.54   | 20.63 | 25.87 | 19.61    | 22.14  |
| IL-8 | 24.68 | 19.46  | 19.37  | 19.79  | 24     | 19.5    | 20.57 | 26.26 | 19.57    | 21.94  |
| IL-6 | 27.06 | *22.86 | *22.93 | 22.88  | 26.13  | *23.27  | 23.94 | 28.4  | 23.07    | 26.15  |
| IL-6 | 26.59 | 22.55  | 22.62  | 22.91  | 25.85  | 22.83   | 23.82 | 28.4  | 22.84    | 25.24  |
| IL-6 | 26.06 | 22.6   | 22.63  | 22.76  | 26.09  | 22.81   | 23.56 | 27.57 | 23.02    | 25.53  |
| S9   | 21.81 | 21.73  | 21.7   | 21.26  | 21.68  | 21.73   | 21.86 | 21.42 | 21.72    | *21.73 |
| S9   | 21.96 | *22.08 | 21.57  | *21.71 | 21.64  | *22.22  | 21.89 | 21.64 | 21.62    | 22.01  |
| S9   | 21.96 | 21.59  | 21.52  | 21.2   | 21.7   | 21.72   | 21.72 | 21.52 | 21.57    | *21.62 |
| S9   | 21.77 | 21.65  | 21.76  | 21.29  | *21.41 | 21.65   | 21.85 | 21.53 | 21.64    | 21.8   |

\* outlier (excluded from average calculation)

2. WST-1 assays - OD 450/620nm

Figure 2C - Ba/F3 cells

|                | Triton-X100  | DMSO 0.1%    | SFN          |              |              |              | GMG-ITC      |              |              |              |
|----------------|--------------|--------------|--------------|--------------|--------------|--------------|--------------|--------------|--------------|--------------|
|                |              |              | 0.1 $\mu$ M  | 1 $\mu$ M    | 10 $\mu$ M   | 100 $\mu$ M  | 0.02 $\mu$ M | 0.2 $\mu$ M  | 2 $\mu$ M    | 20 $\mu$ M   |
| 450-620        | 0.058        | 1.698        | 1.403        | 1.864        | 1.387        | 0.839        | 1.848        | 1.824        | 1.491        | 0.756        |
|                | 0.061        | 2.022        | 1.828        | 1.761        | 1.387        | 0.802        | 1.897        | 1.805        | 1.318        | 0.752        |
|                | 0.073        | 1.65         | 1.886        | 1.759        | 1.378        | 0.804        | 1.895        | 1.762        | 1.521        | 0.737        |
| <b>Average</b> | <b>0.064</b> | <b>1.790</b> | <b>1.706</b> | <b>1.795</b> | <b>1.384</b> | <b>0.815</b> | <b>1.880</b> | <b>1.797</b> | <b>1.443</b> | <b>0.748</b> |
| <b>StDev</b>   | <b>0.008</b> | <b>0.202</b> | <b>0.264</b> | <b>0.060</b> | <b>0.005</b> | <b>0.021</b> | <b>0.028</b> | <b>0.032</b> | <b>0.110</b> | <b>0.010</b> |

Figure 3B - HeLa cells

|                | Triton-X100  | DMSO 0.1%    | SFN          |              |              |              | GMG-ITC      |              |              |              |
|----------------|--------------|--------------|--------------|--------------|--------------|--------------|--------------|--------------|--------------|--------------|
|                |              |              | 0.1 $\mu$ M  | 1 $\mu$ M    | 10 $\mu$ M   | 100 $\mu$ M  | 0.02 $\mu$ M | 0.2 $\mu$ M  | 2 $\mu$ M    | 20 $\mu$ M   |
| 450-620        | 0.18         | 1.454        | 1.449        | 1.492        | 1.24         | 0.729        | 1.434        | 1.495        | 1.205        | 0.627        |
|                | 0.189        | 1.475        | 1.531        | 1.489        | 1.166        | 0.683        | 1.556        | 1.429        | 1.113        | 0.709        |
|                | 0.182        | 1.501        | 1.566        | 1.426        | 1.23         | 0.719        | 1.536        | 1.462        | 1.188        | 0.602        |
| <b>Average</b> | <b>0.184</b> | <b>1.477</b> | <b>1.515</b> | <b>1.469</b> | <b>1.212</b> | <b>0.710</b> | <b>1.509</b> | <b>1.462</b> | <b>1.169</b> | <b>0.646</b> |
| <b>StDev</b>   | <b>0.005</b> | <b>0.024</b> | <b>0.060</b> | <b>0.037</b> | <b>0.040</b> | <b>0.024</b> | <b>0.065</b> | <b>0.033</b> | <b>0.049</b> | <b>0.056</b> |

Figure 2D (Michl et al.) – uncropped Western blots

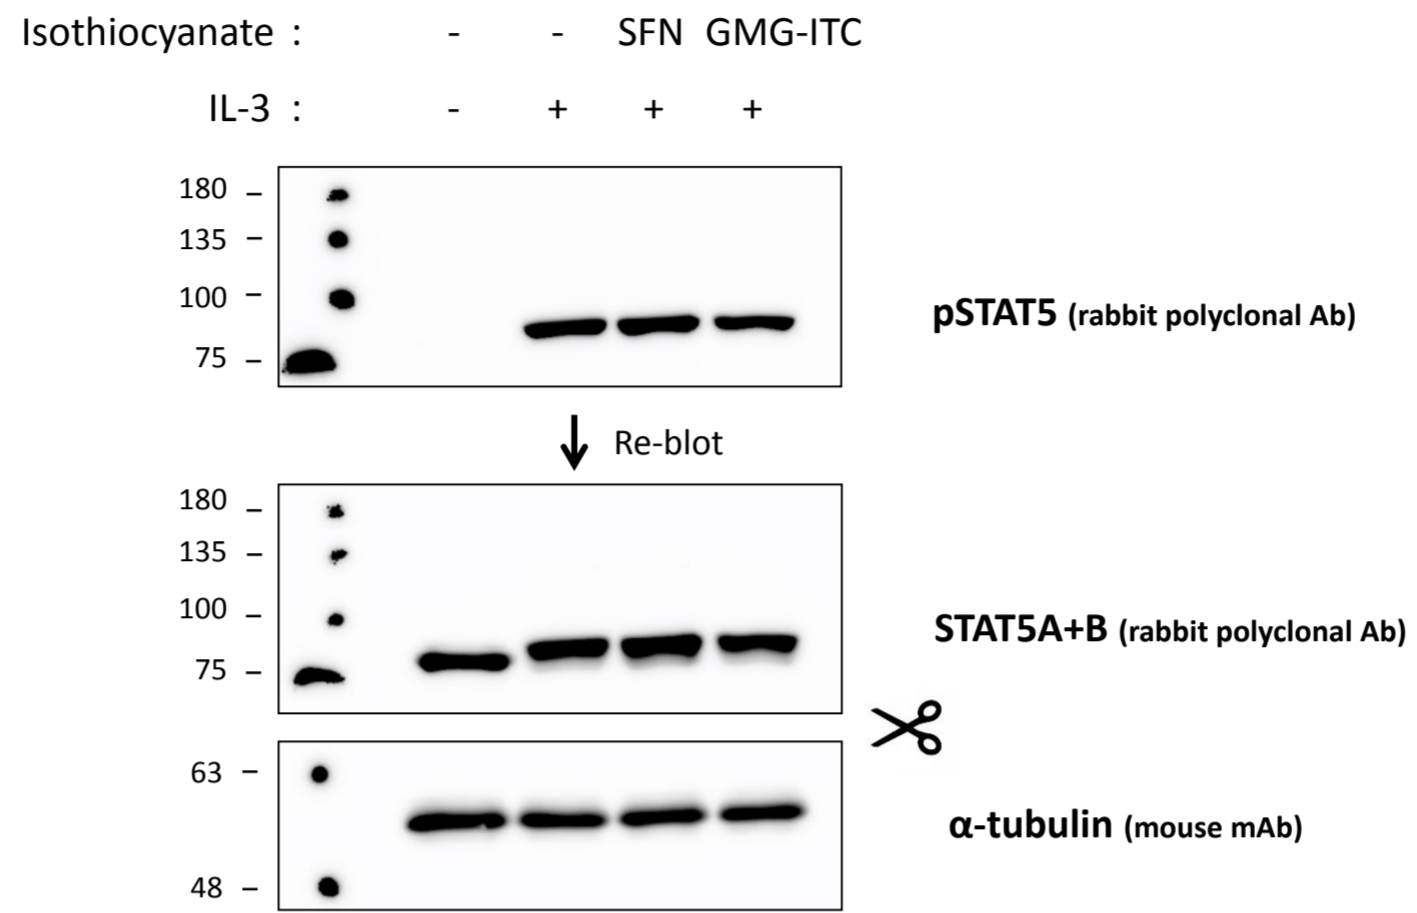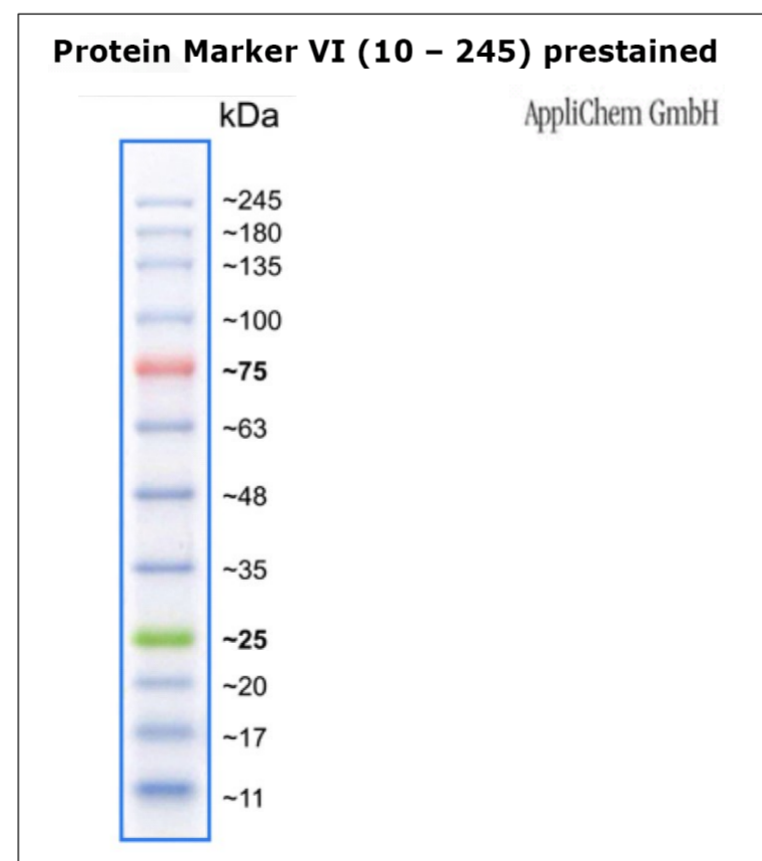

Figure 3C (Michl et al.) – uncropped Western blots

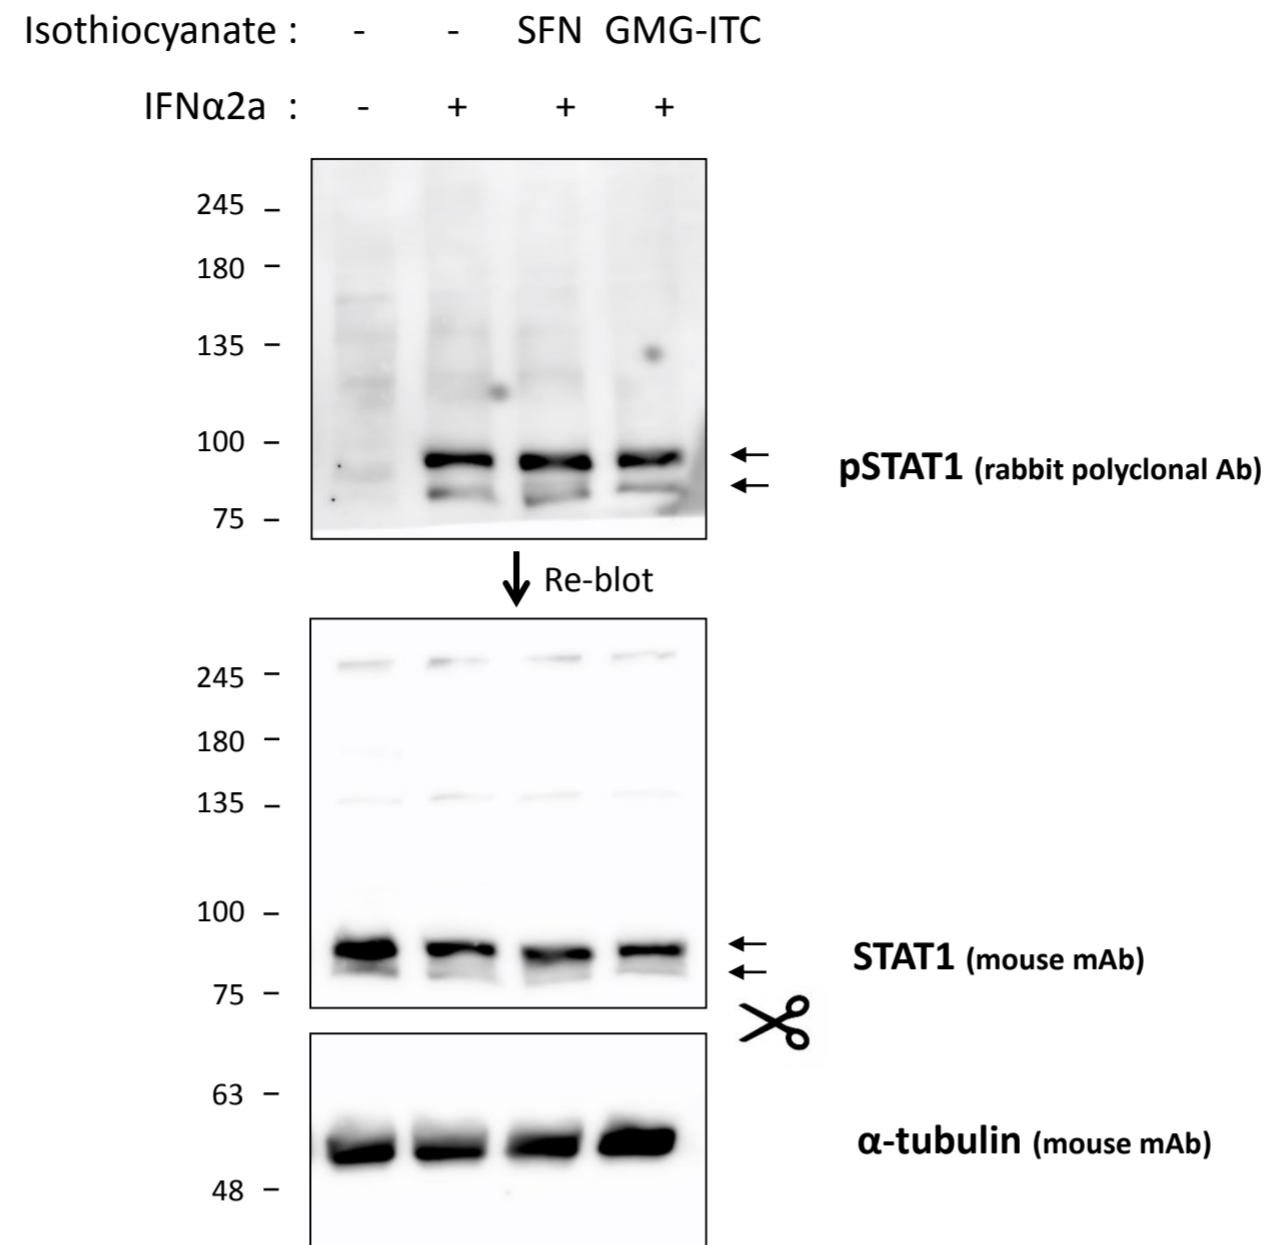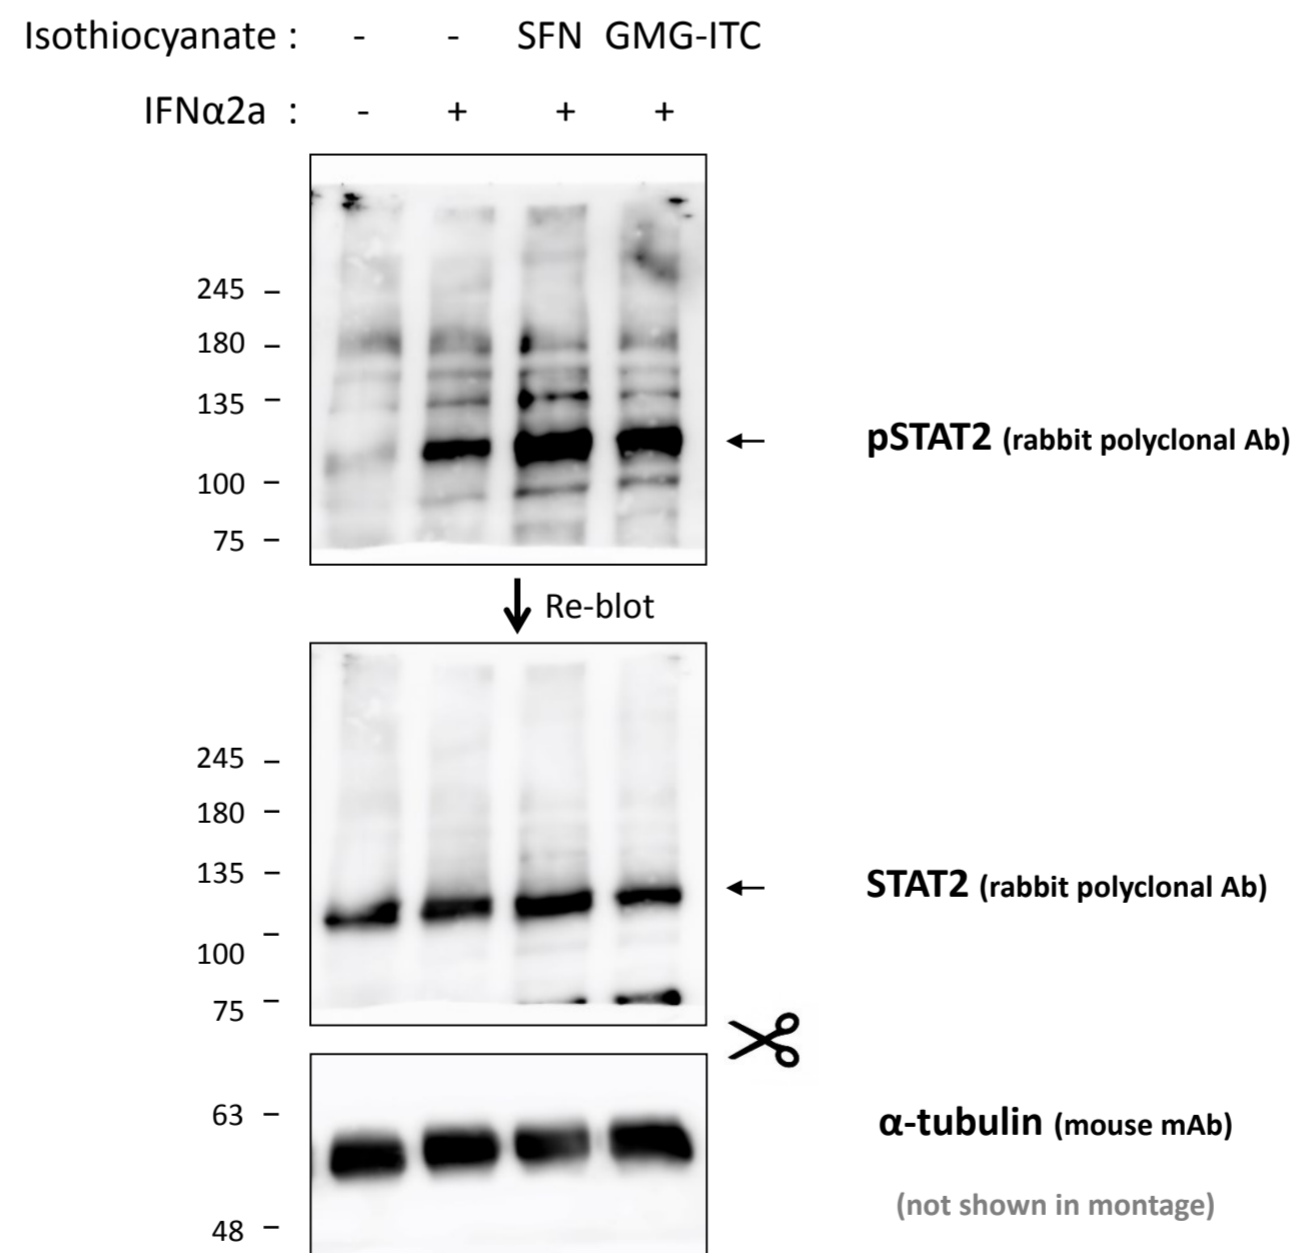

Figure 5C (Michl et al.) – uncropped Western blots

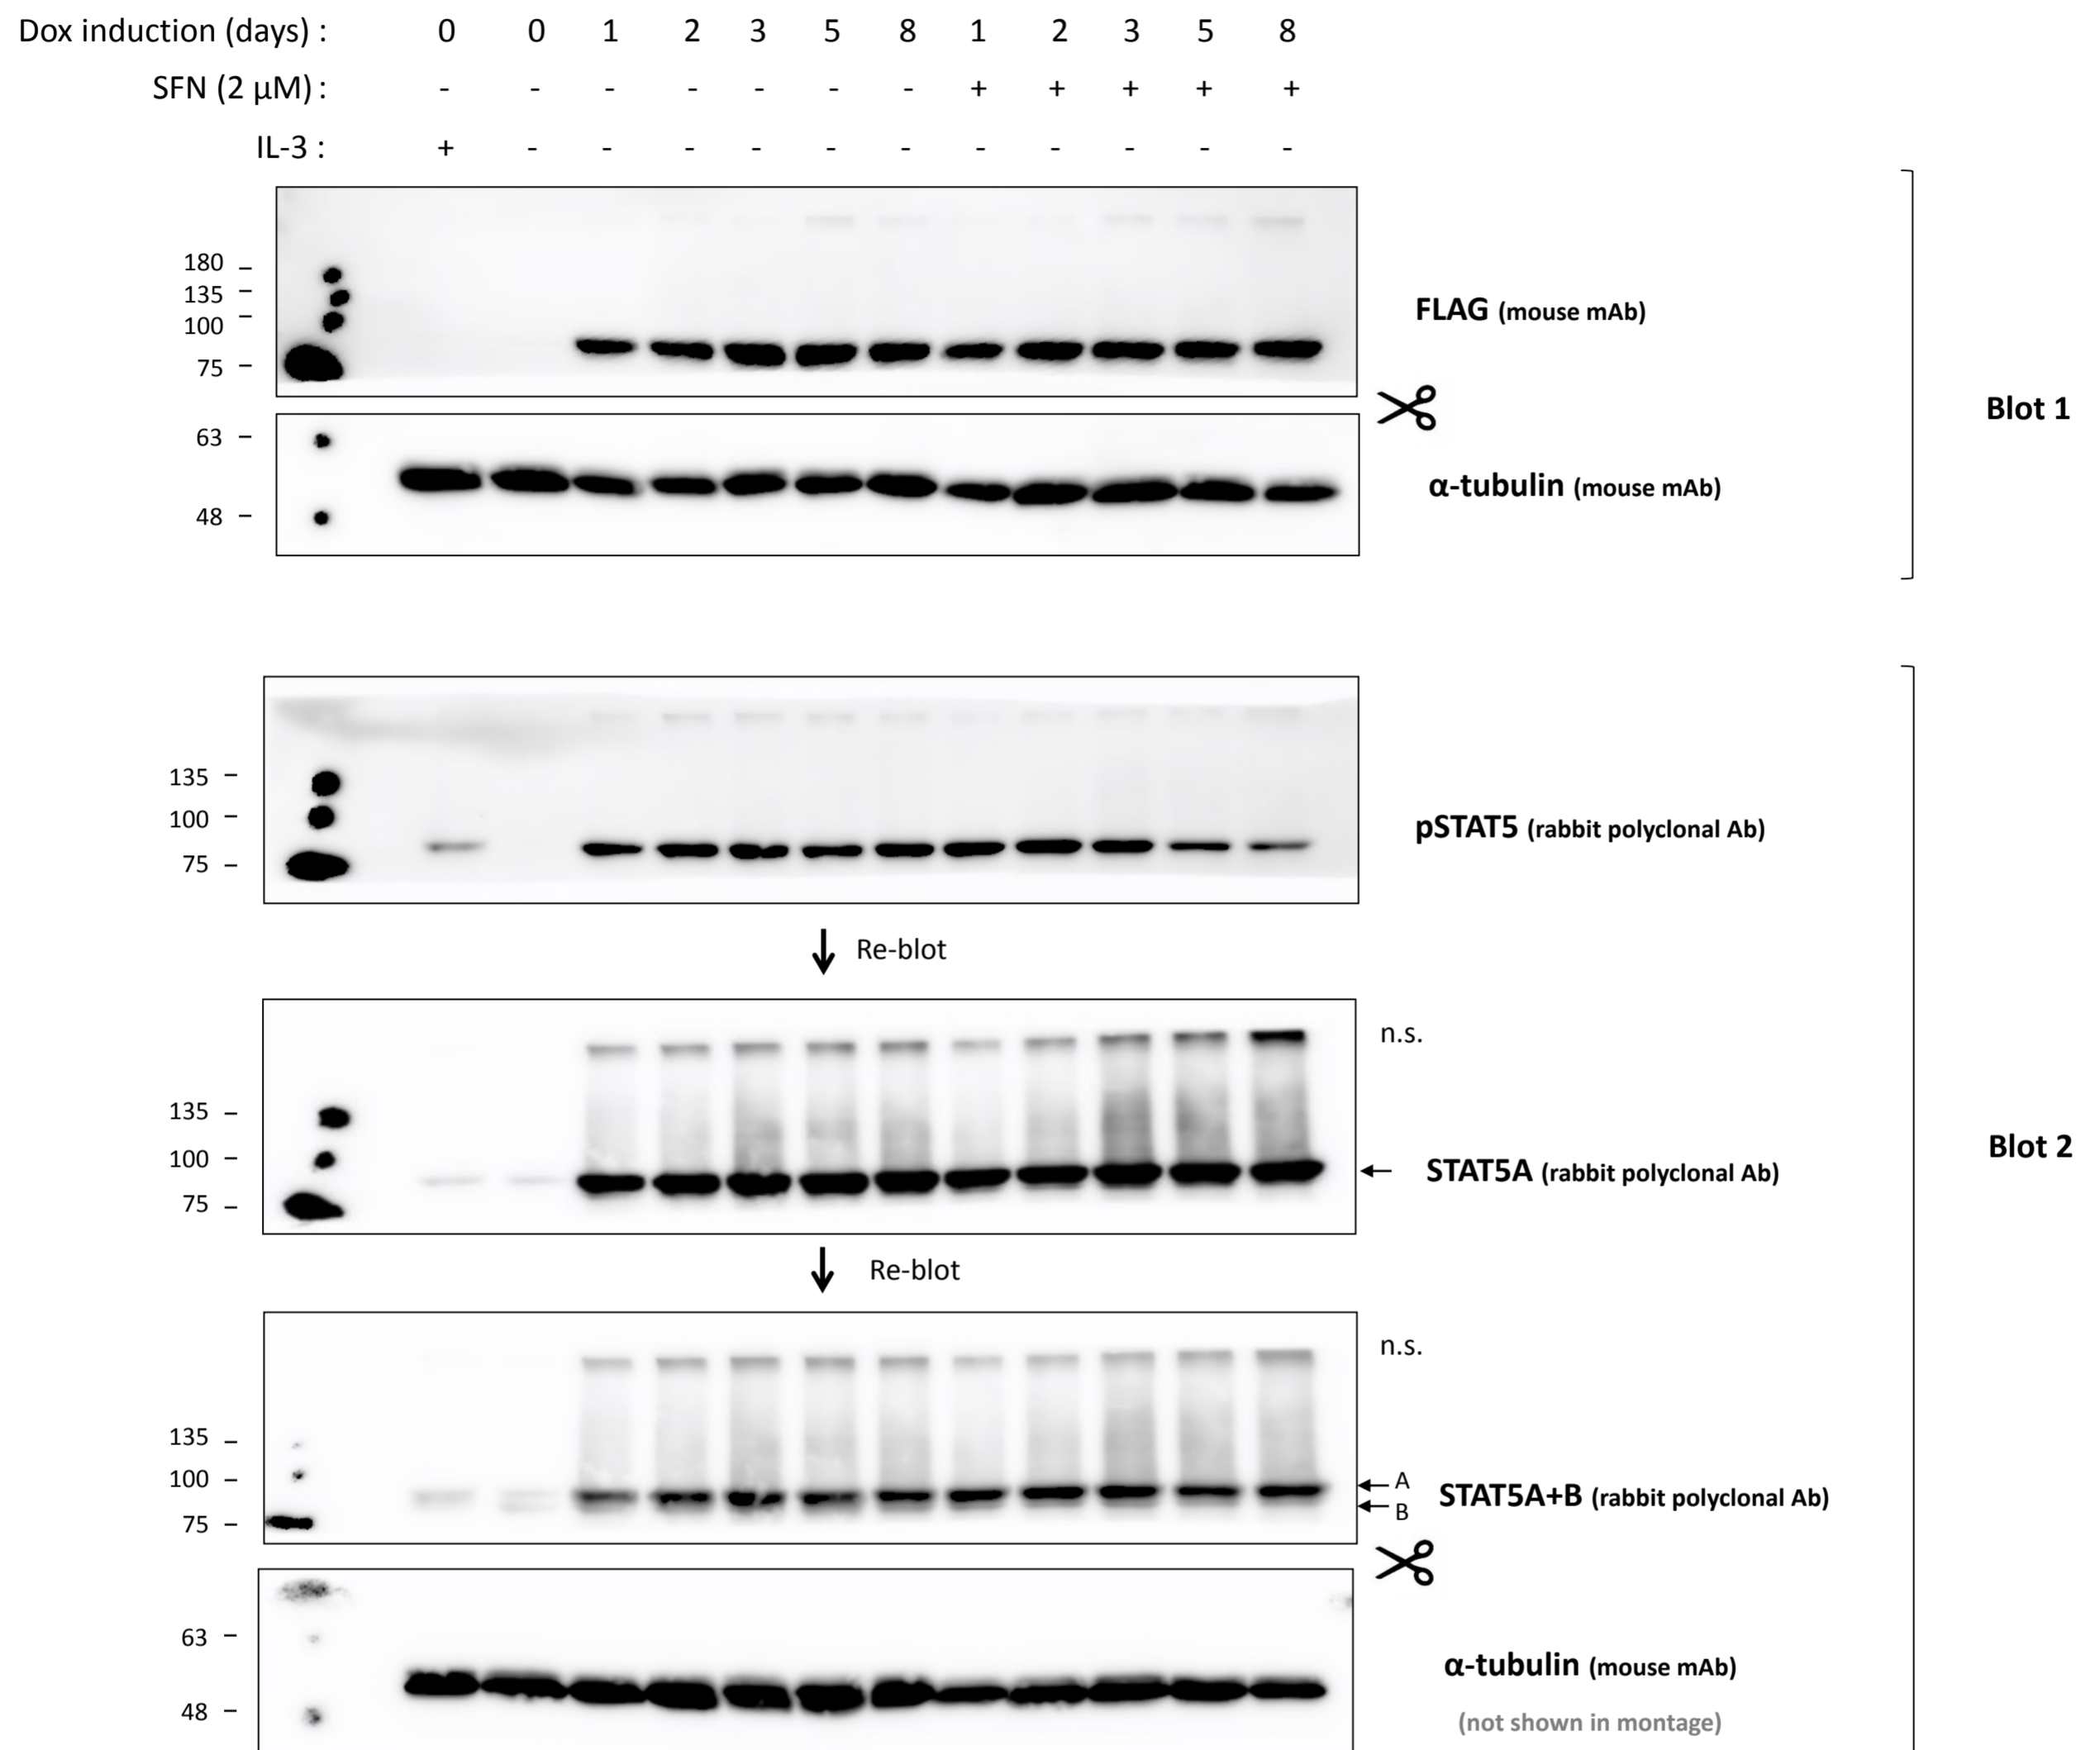

Supplement: pone.0157430.s002.pdf [file pone.0157430.s002.pdf]
